# Supplementary material for: Water Quality, Heavy Metals, and Antifungal Susceptibility to Fluconazole of Yeasts from Water Systems
Source: Int J Environ Res Public Health. 2023 Feb 15;20(4):3428. doi: 10.3390/ijerph20043428 (PMC9968106; doi:10.3390/ijerph20043428)
Supplement: Supplementary file 1 [file ijerph-20-03428-s001.zip › ijerph-2156793-supplementary.pdf]

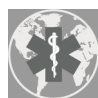

## Supplementary Material

**Table S1.** Yeast strains were analyzed in this study. We used two methods of identification: Biochemical tests (API 20C) and sequence analysis. Yeast strains labeled with "CS" were isolated from the South Channel, Navarro; yeast strains labeled with "P" were isolated from WWTP "PTAR"; yeast strains labeled with "PM" were isolated from DWTP "Puerto Mallarino", Cauca River; and yeast strains labeled with "M" were isolated from Melendez River. ND: not determined. ITS= Internal Transcribed Spacers; LSU= D1/D2 domain of the Large Subunit of the Ribosome.

| Strain | Species                           | Identification method | GenBank Accession | Reference |
|--------|-----------------------------------|-----------------------|-------------------|-----------|
| CS11   | <i>Rhodotorula paludigena</i>     | ITS                   | MT161369          | [26]      |
| CS12A  | <i>Rh.mucilaginosa</i>            | ITS                   | -                 | [26]      |
| CS13   | <i>Rh.paludigena</i>              | ITS                   | MT161370          | [26]      |
| CS14   | ND                                | -                     | -                 |           |
| CS15   | <i>Vanrija humicola</i>           | API 20C               | -                 |           |
| CS16   | <i>Candida parapsilosis</i>       | API 20C               | -                 |           |
| CS17   | <i>Diutina catenulata</i>         | ITS                   | OP696682          |           |
| CS17A  | <i>Rh.mucilaginosa</i>            | LSU                   | OP658772          | [26]      |
| CS18   | <i>D. catenulata</i>              | ITS                   | OP696683          |           |
| CS19   | <i>C. tropicalis</i>              | LSU                   | OP658773          |           |
| CS1A   | <i>C. glabrata</i>                | API 20C               | -                 |           |
| CS1B   | <i>Rh. mucilaginosa</i>           | ITS                   | -                 | [26]      |
| CS2    | <i>Candida</i> sp. 1 <sup>a</sup> | ITS                   | OP696681          |           |
| CS20A  | <i>C. tropicalis</i>              | LSU                   | OP658775          |           |
| CS20B  | <i>Rhodotorula paludigena</i>     | ITS                   | MT161371          | [26]      |
| CS21   | <i>Pichia fermentans</i>          | ITS                   | OP696684          |           |
| CS22   | ND                                | -                     | -                 |           |
| CS23   | <i>Cryptococcus neoformans</i>    | API 20C               | -                 |           |
| CS24   | <i>Cr. neoformans</i>             | API 20C               | -                 |           |
| CS4    | <i>Trichosporon mucoides</i>      | API 20C               | -                 |           |
| CS45   | <i>P. kluyveri</i>                | ITS                   | OP696685          |           |
| CS51A  | <i>D. catenulata</i>              | ITS                   | -                 |           |
| CS51B  | <i>C. tropicalis</i>              | API 20C               | -                 |           |
| CS55   | <i>C. albicans</i>                | ITS                   | OP696686          |           |
| CS7    | <i>C. tropicalis</i>              | ITS/LSU               | OP658776          |           |
| CS7B   | <i>Geotrichum candidum</i>        | API 20C               | -                 |           |
| CS7C   | ND                                | -                     | -                 |           |
| CS9    | <i>Candida</i> sp. 1              | ITS                   | MK256275          |           |
| CS9A   | <i>Rh. mucilaginosa</i>           | ITS                   | MT161372          | [26]      |
| CS9B   | <i>Rh. mucilaginosa</i>           | ITS                   | OP696687          | [26]      |
| M10    | <i>Rh. paludigena</i>             | ITS                   | -                 |           |
| M12    | ND                                | -                     | -                 |           |
| M14    | <i>P. kudriavzevii</i>            | ITS/LSU               | OP658777          |           |
| M2     | ND                                | -                     | -                 |           |
| M23A   | <i>P. kudriavzevii</i>            | LSU                   | OP658778          |           |
| M23B   | <i>Rh. paludigena</i>             | ITS                   | MT161375          | [26]      |

|       |                                           |         |          |      |
|-------|-------------------------------------------|---------|----------|------|
| P1    | <i>C. albicans</i>                        | ITS     | OP696688 |      |
| P10A  | <i>Rh. mucilaginosa</i>                   | ITS     | MT161376 | [26] |
| P10B  | <i>Rh. mucilaginosa</i>                   | ITS     | -        | [26] |
| P12   | <i>P. kudriavzevii</i>                    | ITS/LSU | OP658782 |      |
| P13A  | <i>Candida</i> sp. 1                      | ITS     | MK256275 |      |
| P13B  | <i>C. albicans</i>                        | API 20C | -        |      |
| P14   | <i>C. aaseri</i>                          | ITS/LSU | OP658783 | [81] |
| P15   | <i>P. fermentans</i>                      | ITS     | -        |      |
| P16A  | <i>C. tropicalis</i>                      | API 20C | -        |      |
| P16B  | <i>Papiliotrema laurentii</i>             | ITS     | -        |      |
| P20A  | <i>Debaryomyces hansenii</i>              | API 20C | -        |      |
| P22   | <i>P. kudriavzevii</i>                    | API 20C | -        |      |
| P24A  | <i>D. hansenii</i>                        | ITS     | -        |      |
| P24B  | <i>Rh. mucilaginosa</i>                   | ITS     | OP696689 |      |
| P3    | <i>Saccharomyces cerevisiae</i>           | API 20C | -        |      |
| P3A   | <i>Hanseniaspora pseudoguilliermondii</i> | LSU     | OP658784 |      |
| P4    | <i>C. tropicalis</i>                      | API 20C | -        |      |
| P46   | <i>Candida</i> sp. 2 <sup>b</sup>         | ITS     | MK256277 |      |
| P5    | <i>Meyerozyma guilliermondii</i>          | ITS     | -        |      |
| P7    | <i>Rh. mucilaginosa</i>                   | LSU     | OP658843 |      |
| P8    | <i>Rh. mucilaginosa</i>                   | ITS     | -        |      |
| P9A   | <i>P. fermentans</i>                      | ITS     | OP696690 |      |
| PM14  | <i>G. candidum</i>                        | API 20C | -        |      |
| PM15  | <i>Pichia</i> sp.                         | ITS     | OP696691 |      |
| PM18  | <i>T. coreemiforme</i>                    | ITS     | OP696692 |      |
| PM19  | <i>P. fermentans</i>                      | ITS     | OP696693 |      |
| PM20  | <i>Naganishia</i> sp.                     | ITS     | OP696697 |      |
| PM22  | <i>C. albicans</i>                        | API 20C | -        |      |
| PM24  | <i>Candida</i> sp. 1                      | ITS     | -        |      |
| PM4A  | <i>T. mucoides</i>                        | API 20C | -        |      |
| PM4B  | <i>P. laurentii</i>                       | API 20C | -        |      |
| PM54  | <i>Candida</i> sp. 1                      | ITS     | MK256279 |      |
| PM54A | <i>C. parapsilosis</i>                    | API 20C | -        |      |
| PM59  | <i>Candida</i> sp. 1                      | ITS     | MK256278 |      |
| PM64  | <i>Candida</i> sp. 1                      | ITS     | MK256276 |      |
| PM79  | <i>P. fermentans</i>                      | ITS     | OP696694 |      |
| PM7B  | <i>Pichia</i> sp.                         | ITS     | OP696695 |      |

<sup>a</sup> Closely related to *Candida intermedia*. <sup>b</sup> Closely related to *Candida pseudolambica*
